## REVIEW ARTICLE

# Rational therapeutic approaches to progressive supranuclear palsy

Maria Stamelou,<sup>1</sup> Rohan de Silva,<sup>2</sup> Oscar Arias-Carrión,<sup>1</sup> Evangelia Boura,<sup>1</sup> Matthias Höllerhage,<sup>1</sup> Wolfgang H. Oertel,<sup>1</sup> Ulrich Müller<sup>3</sup> and Günter U. Höglinger<sup>1</sup>

1 Department of Neurology, Philipps University, Marburg, D-35039, Germany

2 Reta Lila Weston Institute of Neurological Studies, UCL Institute of Neurology, London, WC1 N1PS, UK

3 Institut für Humangenetik, Justus-Liebig-Universität, Giessen, D-35392, Germany

Correspondence to: Günter Höglinger,  
Department of Neurology, Philipps University,  
Rudolf-Bultmann Str. 8,  
D-35033 Marburg,  
Germany  
E-mail: guenter.hoeglinger@med.uni-marburg.de

**Progressive supranuclear palsy is a sporadic and progressive neurodegenerative disease, most often presenting as a symmetric, akinetic-rigid syndrome with postural instability, vertical supranuclear gaze palsy and frontal lobe deficits. It belongs to the family of tauopathies and involves both cortical and subcortical structures. Although the exact pathophysiology is not yet fully understood, several lines of evidence point to a crucial contribution from both genetic predisposition and mitochondrial dysfunction. Recently gained insights into the pathophysiology of this disease have led to several hypothesis-driven therapeutic approaches aiming at disease-modification rather than mere symptomatic neurotransmitter-replacement therapy. Agents targeting mitochondrial dysfunction have already shown a positive effect in a phase II study and further studies to verify and expand these results are ongoing. Clinical studies with agents targeting tau dysfunction such as tau-kinase inhibitors, tau-aggregation inhibitors and microtubule stabilizers are in preparation or ongoing. This review presents the current pathophysiological concepts driving these exciting therapeutic developments.**

**Keywords:** progressive supranuclear palsy; aetiology; mitochondrial respiratory chain; complex I; microtubule associated protein tau

**Abbreviations:** FDG-PET = <sup>18</sup>F-fluoro-2-deoxy-glucose-positron emission tomography; GSK = glycogen synthase kinase; HSP = heat shock protein; MAPT = microtubule associated protein tau; MPTP = 1-methyl-4-phenyl-1,2,3,6-tetrahydropyridine; MRS = magnetic resonance spectroscopy; PSP = progressive supranuclear palsy; UBB+1 = ubiquitin B +1

## Progressive supranuclear palsy

Progressive supranuclear palsy (PSP, Steele–Richardson–Olszewski syndrome) is a sporadic and progressive neurodegenerative disease (Litvan *et al.*, 1996; Burn and Lees, 2002; Williams and Lees, 2009). PSP has an average prevalence of 5.3 per 100 000 (Bower *et al.*, 1997; Schrag *et al.*, 1999; Nath *et al.*, 2001). The

mean age at onset is approximately 63 years with a mean survival of 9 years from the onset of symptoms (Rajput and Rajput, 2001; Burn and Lees, 2002; Litvan *et al.*, 2003; Golbe and Ohman-Strickland, 2007). No effective symptomatic, disease-modifying or neuroprotective therapy is presently available. As a first step towards the development of effective treatments, a detailed understanding of the underlying pathophysiology is needed.

## Clinical presentation

The classical clinical picture of PSP, presenting most frequently with a symmetric, akinetic-rigid syndrome, vertical supranuclear gaze palsy, frontal deficits, prominent postural instability and falls, is now referred to as Richardson's syndrome (Litvan *et al.*, 1996; Williams *et al.*, 2005; 2007) and seems to comprise about half of the patients. However, several variants in the clinical presentation of pathologically confirmed PSP have been described recently, complicating the early differential diagnosis.

PSP-parkinsonism is characterized by asymmetric onset, tremor and moderate initial therapeutic response to levodopa, and it is estimated to comprise about one third of the patients (Williams *et al.*, 2005, 2007). Early gait disturbance with freezing, micrographia and hypophonia constitute another variant called pure akinesia with gait freezing (Williams *et al.*, 2007). Progressive, asymmetric dystonia, apraxia and cortical sensory loss (PSP–corticobasal syndrome) and progressive non-fluent aphasia are additional clinical phenotypes, which present with more pronounced cortical pathology (Josephs *et al.*, 2005; Tsuboi *et al.*, 2005). Further clinical variants are PSP with pallido-nigro-lusian-atrophy (Ahmed *et al.*, 2008), with frontotemporal dementia (Kaat *et al.*, 2007) and with semantic dementia (Josephs *et al.*, 2006).

The heterogeneity of the clinical presentation appears to follow variations in the anatomical distribution of distinct, PSP-specific histopathological alterations (Ahmed *et al.*, 2008; Williams and Lees, 2009). These clinical presentations have been described based on retrospective neuropathological studies. To date it is unknown whether and to what extent they apply to the clinically relevant phenotypic spectrum of PSP and if it will be possible to diagnose them reliably *in vivo* in absence of validated diagnostic criteria or biomarkers.

## Neuropathology

Neuronal cell loss involves both cortical and subcortical structures, in particular the subthalamic nuclei, globus pallidus, superior colliculi, pretectal regions, periaqueductal grey matter, substantia nigra, thalamus, cerebellum, the entire tegmentum and the spinal cord (Hauw *et al.*, 1994; Daniel *et al.*, 1995; Rajput and Rajput, 2001; Iwasaki *et al.*, 2007).

Histopathological examinations demonstrate intracellular, somatodendritic tau-aggregates revealed by silver staining or by immunohistochemistry with antibodies against phosphorylated tau protein (e.g. AT8 or AD2 antibodies) (Dickson, 1999) (Fig. 1). Neurofibrillary tangles in neurons, neuropil threads in neuronal processes, coiled bodies in oligodendrocytes, tufted astrocytes in the basal ganglia, amygdala and motor cortex and the absence of neuritic plaques help to differentiate PSP from other tauopathies. Ultrastructurally, the tau-aggregates present as paired helical filaments and spherical filaments (Dickson, 1999).

Biochemical examinations in the affected regions demonstrate an abnormal accumulation of insoluble, hyperphosphorylated specimen of the microtubule associated protein tau (*MAPT*) and an altered ratio of the tau isoforms (3R-tau and 4R-tau) in favour of 4R-tau (Fig. 2).

## Aetiology

The development of an effective, disease-modifying therapy requires a detailed understanding of the disease mechanisms. Recent studies provided evidence for mitochondrial dysfunction in PSP (Stamelou *et al.*, 2008; 2009). Yet, there is also a strong genetic component in the aetiology of PSP, since some rare cases follow an autosomal dominant mode of inheritance, and sporadic patients with PSP have more first-degree relatives with parkinsonism compared to controls (odds ratio 3.9; Kaat *et al.*, 2009). Such observations suggest that rare variants of PSP are caused by either genetic or environmental factors, whereas the vast majority of cases result from an interaction of genetic and environmental factors.

Apart from mitochondrial dysfunction and genetic predisposition, other possible aetiological factors have also been implicated in the pathophysiology of PSP, but strong evidence supporting their contribution is still lacking. The way and sequence in which the putative aetiological factors cooperate to mediate increased levels of 4R-tau, abnormal tau hyperphosphorylation, formation of neurofibrillary tangles and ultimately cell death remains uncertain. Thus, we review here the evidence for genetic predisposition and mitochondrial dysfunction and their interplay as core phenomena in the pathophysiology of the disease, which may be the basis of a future effective, disease-modifying therapy (Table 1).

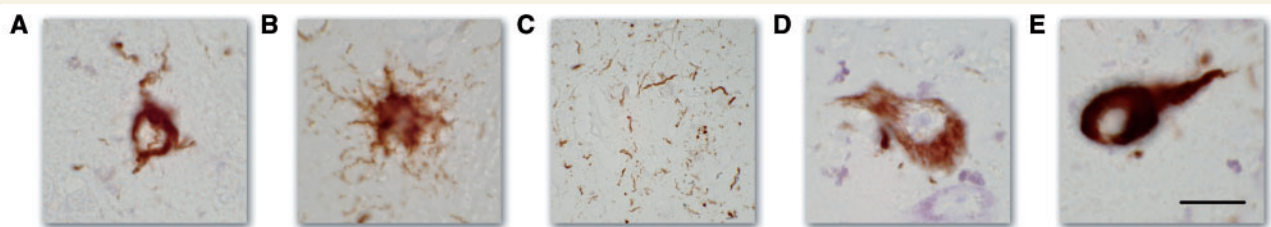

**Figure 1** The histopathological hallmarks of PSP. Immunohistochemical examination of the striatum of a deceased patient with PSP, using an antibody (AD2) raised against the human tau protein phosphorylated on serine residues 396 and 404, demonstrates cytosolic aggregates in oligodendrocytes (coiled bodies, **A**), in astrocytes (astrocytic tufts, **B**), in neuronal processes (neuropil threads, **C**) and in neurons (pre-tangles, **D** and neurofibrillary tangles, **E**). Scale bar = 50  $\mu$ m.

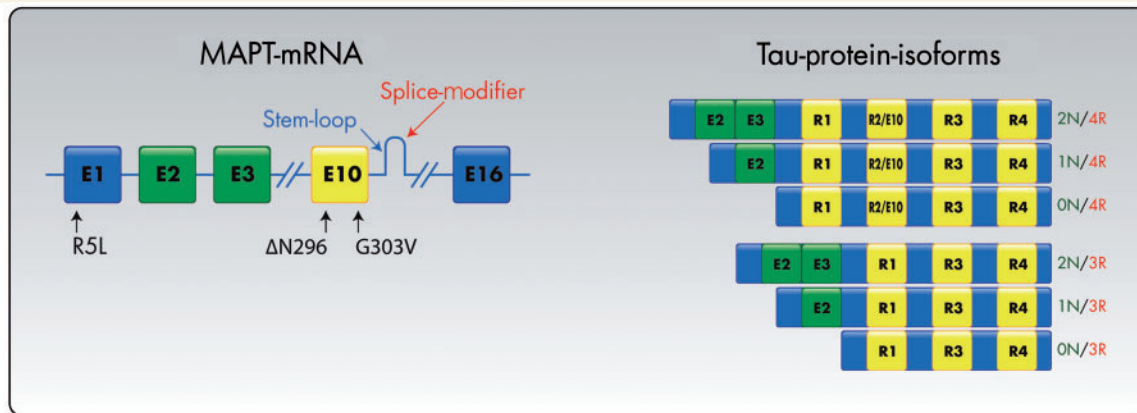

**Figure 2** The microtubule associated protein tau. Tau is an abundant microtubule-associated protein, which has predominant axonal localization under physiological conditions. Human tau proteins are encoded by the *MAPT* gene on chromosome 17q21 containing 16 exons (E1–E16). In adult human brain, six tau isoforms ranging from 352 to 441 amino acids in length are generated by alternative mRNA splicing of E2, E3 and E10. Alternative splicing of E2 and E3 results in isoforms without (0N) or with either 29 (1N) or 58 (2N) amino-acid inserts of unknown function in the N-terminal projection domain of tau. In addition, tau contains three or four C-terminal imperfect repeat domains (R1–R4), each consisting of 18-amino-acid repeats separated by 13- or 14-amino acid-long inter-repeat sequences. These repeats, encoded by E9–E12, are the functional microtubule-binding sites of tau. Alternative splicing of E10 produces tau isoforms with either three (E10–) or four (E10+) repeat domains, known as 3R and 4R tau, respectively. In the healthy adult human brain, combination of these N- and C-terminal splice variants leads to a balanced ratio of 3R to 4R tau isoforms (50% each) with the 0N, 1N and 2N isoforms comprising about 37, 54 and 9%, respectively. Mutations of the *MAPT* gene (R5L,  $\Delta$ N296, G303V) have been reported to cause rare autosomal dominant variants of PSP. Splice modifiers acting at the splice donor site of E10 (a stem-loop in the pre-mRNA) may change the isoform ratio to decrease the aggregation-prone 4R-tau isoforms.

## Genetic factors

PSP can be transmitted as an autosomal dominant trait in rare instances. Linkage studies in one large Spanish family (de Yébenes *et al.*, 1995) assigned a disease locus to a 3.4 cM interval on chromosome 1 (1q13.1) (Ros *et al.*, 2005b). However, the underlying gene has not been identified yet because the region is devoid of known genes. In other rare autosomal dominant variants of PSP, several mutations (R5L,  $\Delta$ N296, G303V) of the gene coding for *MAPT* have been reported (Stanford *et al.*, 2000; Pastor *et al.*, 2001; Poorkaj *et al.*, 2002; Rossi *et al.*, 2004; Ros *et al.*, 2005a, b) (Fig. 2).

Despite these few cases with Mendelian inheritance, PSP is a predominantly sporadic disease. In most cases of PSP, *MAPT* plays a predisposing rather than a causative role, since the best-established genetic risk factor for sporadic PSP is the H1 haplotype covering the *MAPT* gene (Conrad *et al.*, 1997; Oliva *et al.*, 1998; Baker *et al.*, 1999; Higgins *et al.*, 2000; de Silva *et al.*, 2001; Houlden *et al.*, 2001; Poorkaj *et al.*, 2002; Morris *et al.*, 2003).

The possible molecular basis of the association of the H1 haplotype has been identified by detailed genetic mapping of the *MAPT* region on chromosome 17 in PSP (Pittman *et al.*, 2005; Rademakers *et al.*, 2005). The dichotomy of the non-recombining H1 and H2 haplotypes is found only in European Caucasian populations (Evans *et al.*, 2004), and originated from a large ~900 kb inversion of this region (Hardy *et al.*, 2005; Stefansson *et al.*, 2005). Normal variation within the H1 clade resulted in multiple sub-haplotypes, and only one of the common (>10% frequency)

sub-haplotypes, designated H1c, is associated with PSP, together with a strong negative (i.e. protective) association of the H2 haplotype (Pittman *et al.*, 2005).

A predisposing role of the H1c-sub-haplotype appears to be mainly mediated by a single nucleotide polymorphism within the 5' promoter region of *MAPT* between the untranslated exon-1 (Andreadis *et al.*, 1996) and the coding exon 1 (Ezquerra *et al.*, 1999; de Silva *et al.*, 2001; Pittman *et al.*, 2005; Rademakers *et al.*, 2005). This polymorphism, referred to as single nucleotide polymorphism-rs242557 (A/G) has strong allele-specific effects on *MAPT* transcription (Rademakers *et al.*, 2005; Myers *et al.*, 2007). Its risk allele (A) is associated with significantly increased *MAPT* transcription (Myers *et al.*, 2007). This allele-specific effect on transcription is combined with increased incorporation of the alternatively spliced *MAPT* exon 10 in transcripts of the H1c allele (Caffrey *et al.*, 2006, 2008; Myers *et al.*, 2007). Exon 10 codes for one of the four microtubule-binding repeat domains and exclusion or inclusion result in the 3R- or 4R-tau isoforms, respectively. The H1 allele, therefore, could be priming the neurodegenerative process via a combined effect of increased *MAPT* transcription and exon 10 splicing. This appears to result in increased levels of the more fibrillogenic 4R-tau isoform, thus providing a plausible molecular basis for the increased risk of developing the 4R-tau-dominant pathology characteristic of PSP (Pittman *et al.*, 2006).

Since the H1 haplotype also has a rather high prevalence among healthy controls, it appears to be a predisposing condition requiring additional genetic or environmental co-factors to trigger the disease. The question of the existence of further genetic factors

Table 1 Clinical trials aiming at disease modification in PSP

| Target          | Mitochondrial dysfunction                               |                                 | Tau dysfunction                                    |                      | Aggregation inhibitors   |                                                                                                | Microtubule stabilizers  |  |
|-----------------|---------------------------------------------------------|---------------------------------|----------------------------------------------------|----------------------|--------------------------|------------------------------------------------------------------------------------------------|--------------------------|--|
| Mechanism       | Complex I cofactor                                      | Multifunctional cocktail        | GSK-3 $\beta$ inhibitors                           |                      |                          |                                                                                                |                          |  |
| Substance       | Coenzyme Q10                                            | Puruvate, creatine, niacinamide | Lithium                                            | Valproic acid        | Nypta                    | Methylnthionium chloride                                                                       | Danuvetide               |  |
| Phase I trial   | -                                                       | Active (NCT00605930)            | Stopped because of poor tolerability (NCT00703677) | -                    | -                        | -                                                                                              | -                        |  |
| Phase II trial  | Significant improvement (Stamelou <i>et al.</i> , 2008) | -                               | -                                                  | Active (NCT00385710) | Recruiting (NCT01049399) | Significant improvement in Alzheimer's disease (Wischik <i>et al.</i> , 2008); PSP not studied | PSP study in preparation |  |
| Phase III trial | Recruiting (NCT00382824)                                | -                               | -                                                  | -                    | -                        | -                                                                                              | -                        |  |

The numbers in the brackets indicate registration numbers at <http://www.clinicaltrials.gov>.

was addressed in a genome-wide association study (Melquist *et al.*, 2007). This analysis was carried out on a 500K single nucleotide polymorphism array with pooled DNAs from 288 patients with PSP with clinical or pathological diagnosis. The association of the *MAPT* H1 haplotype as a risk factor for PSP was confirmed. Moreover, the study identified two single nucleotide polymorphisms and a single haplotype block on the short arm of chromosome 11 (11p12-p11) associated with PSP. The CurePSP<sup>+</sup> Charles D. Peebler Jr. PSP and CBD Genetics Program is presently conducting a more comprehensive genome-wide association study. DNA from more than 1100 patients with PSP with a diagnosis confirmed by autopsy is being analysed with higher density of genotyping (620K single nucleotide polymorphisms). Furthermore, two independent control groups will be studied using the Eigen vector method, a statistical approach to correct for ethnic population admixture. The findings will be verified in an independent cohort of more than 1100 patients. This study is expected to have a tremendous impact on the understanding of the genetic factors implicated in PSP.

## Mitochondrial dysfunction

### Mitochondria in advanced age and disease

The inner membrane of mitochondria contains the respiratory chain (complexes I–V) (Fig. 3A), whose function is to maintain adequate cellular concentrations of ATP by aerobic oxidative phosphorylation. In situations of high energy demand, phosphorylated creatine, which is a rapidly accessible energy storage compound, is dephosphorylated to unphosphorylated creatine, thereby charging adenosine–diphosphate (ADP) by phosphorylation to yield ATP. Each mitochondrion has its own DNA (mitochondrial DNA) comprising 37 genes, 22 of which code for tRNA molecules and 2 for mitochondrial rRNA. The remaining 13 genes encode components of the oxidative phosphorylation system. However, the majority of mitochondrial proteins are encoded by the nuclear genome (Yakes *et al.*, 1997).

Mitochondria are the major cellular source for generation of reactive oxygen species. Complex I is considered to be the major enzyme emitting reactive oxygen species (Lenaz *et al.*, 2006). Reactive oxygen species extract electrons from neighbouring molecules to complete their own orbital, thereby leading to the oxidation of cellular macromolecules including proteins, lipids and DNA (Lenaz *et al.*, 2006). According to the mitochondrial theory of ageing, random mitochondrial DNA alterations induced by reactive oxygen species cause errors in the proteins of oxidative phosphorylation, leading to bioenergetic deficits, which in turn further increase the production of reactive oxygen species, thereby establishing a vicious cycle (Mecocci *et al.*, 1993; Bender *et al.*, 2006).

The molecular and cellular processes occurring during ageing and in neurodegenerative disorders may be similar. However, while in the ageing brain these processes appear to spread out in a random way regarding both anatomical and molecular



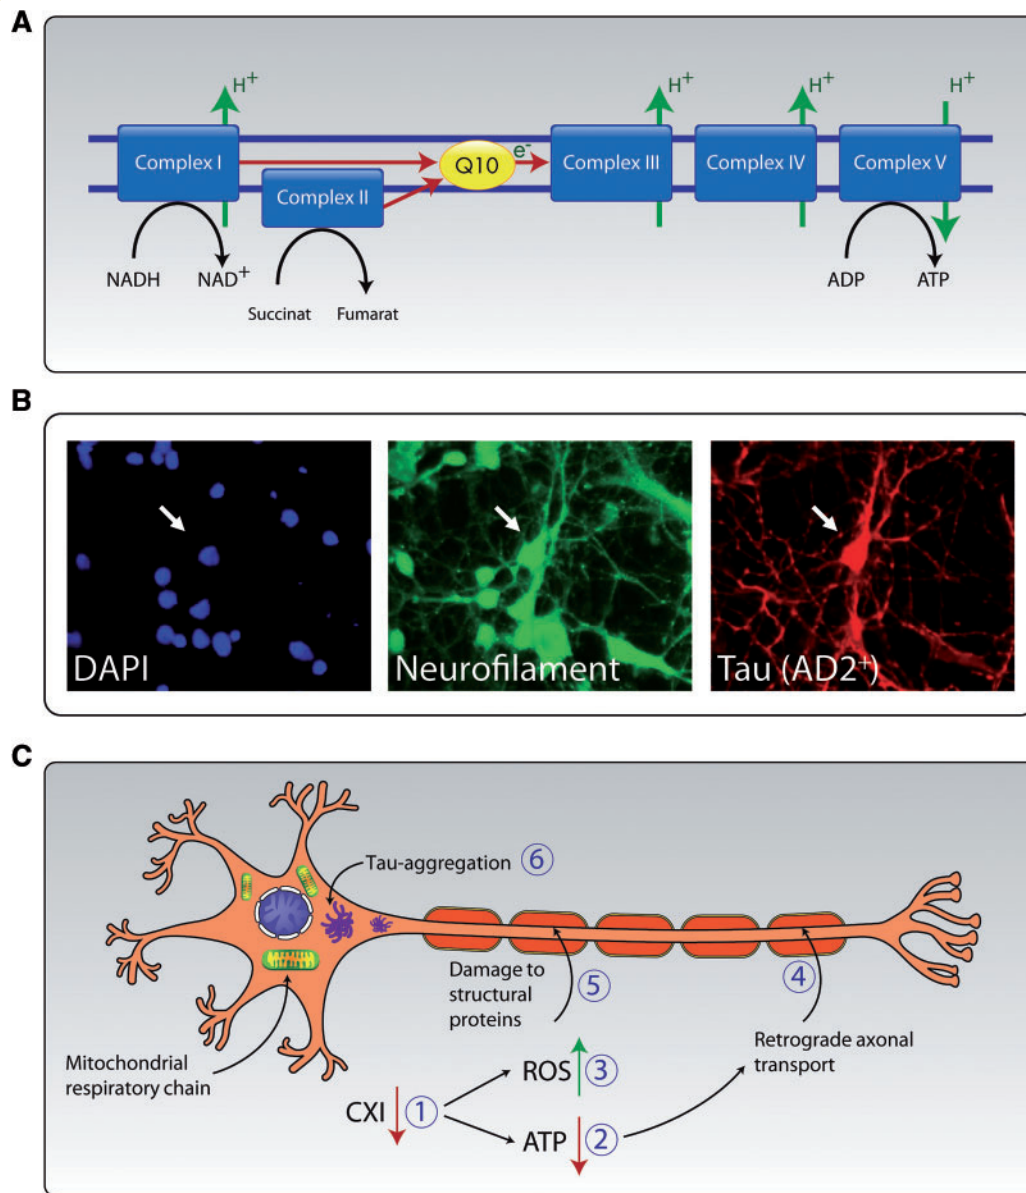

**Figure 3** Pathophysiological concept of mitochondrial dysfunction in PSP. **(A)** The inner mitochondrial membrane contains five protein complexes (complexes I–V), which constitute the respiratory chain. The function of the mitochondrial respiratory chain is to maintain adequate cellular concentrations of ATP by aerobic oxidative phosphorylation. Several lines of evidence point to a dysfunction of the respiratory chain, particularly affecting complex I, in PSP. Dysfunction of the respiratory chain leads to reduced ATP levels and increased generation of reactive oxygen species. Coenzyme Q10 (Q10) serves as a physiological electron (e<sup>-</sup>) shuttle from complexes I and II to complex III, as well as a potent antioxidant. Coenzyme Q10 supplementation enhances the ATP production upon exposure to complex I inhibitors. **(B)** In cultured neurons of rat striatum, nuclei were visualized by 4',6-diamidino-2-phenylindole (DAPI) staining (blue), the cytoplasm by neurofilament immunostaining (green) and phosphorylated tau by immunostaining with the AD2 antibody (red). Treatment with the complex I inhibitor annonacin induces a redistribution of AD2<sup>+</sup> tau from the physiological location in axons to the pathological location in the cell body in individual neurons (white arrow). **(C)** The pathophysiological model assumes that mitochondrial neurotoxins, particularly affecting complex I (CXI) of the mitochondrial respiratory chain (1), induce ATP-depletion (2) and production of reactive oxygen species (ROS, 3). ATP-depletion causes the retrograde transport of mitochondria and phosphorylated tau to the neuronal soma (4). Reactive oxygen species cause damage to structural proteins including microtubules, neurofilaments and tau, which in turn causes further mitochondrial dysfunction (5), which may lead to loss of physiological function. In a chronic condition, elevated levels of phosphorylated tau in the cytoplasm may result in tau-aggregates (6).

structures, in neurodegenerative disease specific causes and cellular disturbances seem to affect specific structures overlaying the age-dependent decrease of the homeostatic reserve. These disease-specific alterations may have both genetic and non-genetic causes (Sas *et al.*, 2007). In PSP, there are several lines of evidence to suggest a failure in mitochondrial energy production as an upstream event in the chain of pathological events leading to tau aggregation and neuronal cell death.

## Indirect evidence of mitochondrial dysfunction

Post-mortem immunochemical studies provided evidence for oxidative stress in PSP brains (Dexter *et al.*, 1992; Sian *et al.*, 1994; Smith *et al.*, 1994; Loeffler *et al.*, 1996; Jenner *et al.*, 1996; Albers *et al.*, 1999; Odetti *et al.*, 2000; Cantuti-Castelvetri *et al.*, 2002). Cytoplasmic hybrid cells (cybrids) are created from a human neuroblastoma or osteocarcinoma cell line lacking mitochondrial DNA by introducing mitochondria from a patient's platelets, and are used to determine whether defects in oxidative phosphorylation are caused by the donor patient's mitochondria (Albers *et al.*, 2002). Cybrids with mitochondria from patients with PSP showed reduced activity of complex I, ATP-production and oxygen consumption, as well as traces indicating oxidative damage, e.g. increased activities of antioxidant enzymes and oxidative damage to lipids (Swerdlow *et al.*, 2000; Albers *et al.*, 2001; Chirichigno *et al.*, 2002). These data provided the first indirect evidence that mitochondrial dysfunction occurs as a primary phenomenon in PSP. However, it remains unclear whether mitochondrial dysfunction is caused by sequence changes in mitochondrial DNA, by mitochondrial toxins, or even by tau oligomers damaging mitochondrial membranes.

## Imaging studies indicating mitochondrial dysfunction

<sup>18</sup>F-fluoro-2-deoxy-glucose-positron emission tomography (FDG-PET) demonstrated hypometabolism in PSP compared to healthy controls, affecting mainly the frontal lobes, cingulate gyri, basal ganglia, thalamus, midbrain and pons (Blin *et al.*, 1990; Johnson *et al.*, 1992; Karbe *et al.*, 1992; Burn *et al.*, 1994; Santens *et al.*, 1997; Hosaka *et al.*, 2002; Juh *et al.*, 2004, 2005). Still, FDG-PET does not distinguish whether hypometabolism is a primary phenomenon leading to cell death or a secondary phenomenon following cell death. The hypometabolism found in the aforementioned PSP studies is likely to be secondary as a consequence of neuronal cell loss, since the stage of the patients studied was rather advanced to ensure sufficient diagnostic certainty (Golbe and Ohman-Strickland, 2007). Of interest, in regions without pronounced cell loss like the parietal lobes, hypermetabolism has been reported, which could be compensatory to a primary mitochondrial dysfunction (Eckert *et al.*, 2005, 2008). Nevertheless, it cannot be ruled out that these observations may be simply compensatory for some other disease-related process.

A more reliable technique to study the energy metabolism *in vivo* is proton and phosphorus magnetic resonance

spectroscopy (<sup>1</sup>H- and <sup>31</sup>P-MRS). High-energy metabolites (ATP and phosphorylated creatine) and inorganic phosphate can be quantified *in vivo* by <sup>31</sup>P-MRS. Lactate, an indicator of anaerobic glycolysis and *N*-acetylaspartate, a marker of neuronal integrity, can be quantified by <sup>1</sup>H-MRS (Moffett *et al.*, 2007; Rango *et al.*, 2007). In a recent study, combined <sup>31</sup>P- and <sup>1</sup>H-MRS in 21 clinically probable PSP patients at early stages showed decreased concentrations of high-energy phosphates in the basal ganglia and frontal lobes, without *N*-acetylaspartate alterations, suggesting that this decrease is unlikely to be a consequence of neuronal death only and that mitochondrial dysfunction could be an upstream phenomenon in the sequence of events leading to neurodegeneration in PSP (Stamellou *et al.*, 2009).

## Mitochondrial neurotoxins

An environmental factor has been implicated in the aetiology of PSP by the description of a sporadic PSP-like disease that has been linked to chronic consumption of plants of the Annonaceae family, in particular *Annona muricata* in Guadeloupe (Caparros-Lefebvre and Elbaz, 1999; Lannuzel *et al.*, 2007), but also in other regions (Angibaud *et al.*, 2004). One third of the patients manifesting parkinsonism presented with clinical signs and symptoms resembling PSP (Caparros-Lefebvre and Elbaz, 1999; Caparros-Lefebvre *et al.*, 2002, 2005, 2006; Lannuzel *et al.*, 2007). Autopsy was only performed in three cases that were neuropathologically confirmed as PSP. However, it is still possible that these were sporadic PSP cases unrelated to the other cases (Caparros-Lefebvre *et al.*, 2002).

Annonaceae plants contain acetogenins, which are highly lipophilic, stable and extremely potent inhibitors of complex I at nanomolar concentrations *in vitro* (Zafra-Polo *et al.*, 1996). Annonacin, the most abundant acetogenin in *A. muricata*, inhibits complex I with an IC<sub>50</sub> of about 30 nM and kills neurons by ATP-depletion. When administered intravenously to rats for 28 days, annonacin decreases brain ATP levels and induces pronounced neurodegeneration in basal ganglia and brainstem nuclei (Champy *et al.*, 2004), which mimics the distribution seen in brains from patients with atypical parkinsonism in Guadeloupe (Caparros-Lefebvre *et al.*, 2002).

Based on these data, further environmental lipophilic complex I inhibitors have been studied and were found to cause decreased ATP levels, neuronal cell death and somatodendritic redistribution of phosphorylated tau protein from axons to the cell body in primary cultures of foetal rat striatum (Escobar-Khondiker *et al.*, 2007; Höllerhage *et al.*, 2009). Their potency to decrease ATP-levels correlated with their potency to induce tau redistribution, suggesting that ATP depletion is the main underlying cause of tau redistribution.

## Association between mitochondrial dysfunction and tau aggregation

In primary cultures of rat striatal neurons treated with annonacin for 48 h, a concentration-dependent decrease in ATP levels, a redistribution of tau from the axons to the cell body and cell death was observed (Fig. 3B) (Escobar-Khondiker *et al.*, 2007;

Höllerhage *et al.*, 2009). Redistribution of tau and cell death were prevented by forced expression of the *ND1* NADH-quinone-oxidoreductase of *Saccharomyces cerevisiae*, which can restore NADH-oxidation in complex I-deficient mammalian cells, as well as by stimulation of energy production via anaerobic glycolysis. Other ATP-depleting neurotoxins reproduced the somatic redistribution of tau, whereas toxins that did not decrease ATP levels did not cause redistribution of tau, suggesting that ATP-depletion may be a potent trigger of somatic accumulation of the axonal protein tau (Fig. 3C) (Escobar-Khondiker *et al.*, 2007; Höllerhage *et al.*, 2009).

Additionally, dysfunctional complex I is a major source of cellular reactive oxygen species (Fig. 3C). Increased oxidative stress and reactive oxygen species activate many kinase-based signal transduction pathways (tau-kinases), all of which were found activated in PSP-neurons and glial cells (Ferrer *et al.*, 2001a, b, 2002; Hartzler *et al.*, 2002) and cause hyperphosphorylation of tau (Albers *et al.*, 1999, 2000). Hyperphosphorylated tau is more prone to aggregation than dephosphorylated tau (Iqbal *et al.*, 2008). Consistent with these observations, upregulation and phosphorylation of tau have previously been detected *in vivo* in the substantia nigra of mice treated with 1-methyl-4-phenyl-1,2,3,6-tetrahydropyridine (MPTP), the precursor of the complex I inhibitor 1-methyl-4-phenylpyridinium (MPP<sup>+</sup>) (Smith *et al.*, 2003; Miller *et al.*, 2004) and with the complex I inhibitor rotenone (Höglinger *et al.*, 2005). In conditions of chronic complex I inhibition, the combination of somatodendritic redistribution and hyperphosphorylation is likely to result in tau aggregation (Fig. 3C), which may in turn cause further mitochondrial dysfunction.

Complex I dysfunction is also believed to be an upstream event in Parkinson's disease (Schapira *et al.*, 2008), which is characterized by aggregation of  $\alpha$ -synuclein rather than by tau-pathology. Chronic generalized complex I inhibition with rotenone caused selective nigral dopaminergic cell death and  $\alpha$ -synuclein deposition in rats (Betarbet *et al.*, 2000), reproducing features of Parkinson's disease. However, other studies suggested that generalized complex I inhibition causes tau-pathology and kills neurons in a pattern more reminiscent of PSP (Höglinger *et al.*, 2003; Champy *et al.*, 2004). How could a common mechanism be relevant for such different diseases as Parkinson's disease and PSP?

We found that mild cerebral complex I inhibition in rotenone-treated rats caused aggregates of both  $\alpha$ -synuclein and tau and moderate neuronal cell loss, whereas more severe complex I inhibition caused a predominant tauopathy and severe neuronal loss (Höglinger *et al.*, 2005). Thus, the pathological consequences of complex I inhibition may crucially depend on the severity of the metabolic defect. Other co-variables, such as cell-type specific uptake or elimination mechanisms for mitochondrial neurotoxins (Javitch *et al.*, 1985), the location of the damage within the mitochondrial respiratory chain or genetically determined susceptibility factors (Melquist *et al.*, 2007) might also strongly impact the neuropathological consequences of mitochondrial dysfunction. This could explain why mitochondrial dysfunction is aetiologically implicated in diseases with such different pathology as in PSP, Parkinson's disease, primary mitochondrial

diseases, Alzheimer's disease and Huntington's disease (Quintanilla *et al.*, 2009; Querfurth *et al.*, 2010).

With regard to this concept, it will be intriguing to compare the genetically determined susceptibility factors differing between PSP and Parkinson's disease and other neurodegenerative disorders with mitochondrial failure on a genome wide basis. To date, several studies have shown that the *MAPT* H1 haplotype (see Zhang *et al.*, 2005a and references therein) and specific H1 sub-haplotypes are associated with Parkinson's disease (Skipper *et al.*, 2004; Fidani *et al.*, 2006; Edwards *et al.*, 2010), and these sub-haplotypes seem to be different from the sub-haplotypes associated with PSP (Cruchaga *et al.*, 2009). However, one study with pathologically confirmed Parkinson's disease cases showed that the association of Parkinson's disease is due to the H1/H2 dichotomy alone as none of the H1 specific sub-haplotypes were associated with Parkinson's disease (Vandrovcova *et al.*, 2009).

## Other possible disease mechanisms

Ubiquitin B+1 (UBB+1) is an aberrant ubiquitin protein that was first described in Alzheimer's disease and Down's syndrome brains (van Leeuwen *et al.*, 1998). It was later shown that pontine nuclei of PSP brains contain some neurofibrillary tangles that are immunoreactive for UBB+1 (Fergusson *et al.*, 2000). UBB+1 is the product of misreading of the mRNA derived from the ubiquitin-B gene (*UBB*), leading to an ubiquitin product with a deleted carboxy-terminal glycine-76 and additional 20 frameshift amino acids. UBB+1 inhibits the 26S proteasome and this results in the protection of cells from oxidative stress as with proteasomal inhibition with MG132 and lactacystin (Hope *et al.*, 2003). UBB+1 also causes increased expression of the heat shock proteins, HSP40 and HSP70 (Hope *et al.*, 2003). It is possible that this is responsible for protecting the cells from oxidative stress (Hope *et al.*, 2003). In pontine neurons of PSP brains, there is no co-localization of UBB+1 and HSP40 or HSP70, which could suggest that in the vulnerable neurons in PSP associated with UBB+1, there is the failure to upregulate these chaperones (Hope *et al.*, 2004). *In vitro* experiments show that the chaperones HSP70 and HSP90 promote tau solubility, enhance tau binding to microtubules, cause reduced tau-phosphorylation and thereby prevent tau-aggregation (Dou *et al.*, 2003). Thus, a failure of HSP upregulation has been proposed to play an important role in tau dysfunction, hyperphosphorylation and accumulation in PSP (Hope *et al.*, 2003). These findings would therefore suggest that HSPs play an important role in tau-pathophysiology and might be a possible target for future therapy.

A further mechanism with possible relevance to PSP is a dysregulation of several tau-kinases. Two kinases, the c-Jun N-terminal kinase and p38 kinase, both members of the family of mitogen-activated protein kinases, have been proposed to be of special interest in PSP. *In vitro* both kinases phosphorylate tau only at sites that are pathologically phosphorylated in tauopathies, but not in healthy individuals (Reynolds *et al.*, 1997, 2000). Interestingly both kinases induce apoptosis in several experimental paradigms (Xia *et al.*, 1995; Le-Niculescu *et al.*, 1999; Chang and Karin, 2001). However the absence of caspase-3 in PSP brains



with c-Jun N-terminal kinase expression suggests that instead of apoptosis, the phosphorylation of tau might be the critical process that leads to neuronal dysfunction and death (Atzori *et al.*, 2001).

## Therapeutic approaches

### Targeting tau dysfunction

Both neuropathological and human genetic observations and experimental results from transgenic models point to a central role of dysfunction or dysregulation of the tau protein in the pathophysiology of PSP. The presently available data suggest a pathophysiological concept, according to which tau is being hyperphosphorylated by kinases, which leads to detachment of tau from microtubules. Unbound phosphorylated tau, particularly the 4R-tau isoforms containing exon 10, has an intrinsic propensity to aggregate causing toxicity by a variety of different mechanisms (toxic gain of function). In turn, microtubules are destabilized after detachment of tau and are depolymerized to tubulin-monomers, thereby losing their vital function as railways for intracellular vesicle- and organelle-trafficking (loss of function). This model (Fig. 4) offers various options for therapeutic interventions.

Since the increased 4R/3R-tau ratio, caused by augmented inclusion of exon 10, appears to facilitate the propensity of tau to aggregate, strategies to modify tau mRNA splicing could be a target for causal therapy (Fig. 2). An increased stability of the tau stem loop results in decreased inclusion of exon 10 and

increased expression of 3R-tau (Donahue *et al.*, 2006). In PSP, stabilization of the tau stem loop by splice modifiers might reverse the altered 4R/3R ratio. The aminoglycoside neomycin, for example, can bind and stabilize the tau stem loop via electrostatic interactions (Varani *et al.*, 2000). However, this effect is rather non-specific. Mitoxantrone has recently been identified as another stem loop stabilizer (Liu *et al.*, 2009; Zheng *et al.*, 2009). Modifying splicing and translation by small molecules binding directly to mRNA is currently of substantial interest (Tor *et al.*, 2003; Zaman *et al.*, 2003; Thomas *et al.*, 2006; Donahue *et al.*, 2007).

*In vitro* and *in vivo* studies also implicate increased allele-specific total *MAPT* transcriptional levels associated with the H1c risk sub-haplotype, compared to all the other haplotypes (Myers *et al.*, 2007). Furthermore, there is clear evidence of a mechanistic connection between transcription and splicing whereby rate of transcription influences alternative splicing choices (Kornbliht, 2007). As has been proposed recently (Dickey *et al.*, 2006), a possible therapeutic approach could be the pharmacological reduction of tau levels either at the level of gene expression or clearance of the protein so as to reduce the apparent toxic effect of elevated levels of fibrillogenic protein species within the cytoplasm. This could apply to other proteopathies where increased risk conferred by genetic variation is manifested by increased levels of the pathological proteins that define the respective disorders.

Hyperphosphorylation of tau in tauopathies is regulated by several kinases that phosphorylate specific serine or threonine residues of the tau protein (Fig. 4B). Glycogen synthase kinase (GSK)-3 is a serine/threonine protein kinase involved in the pathogenesis of

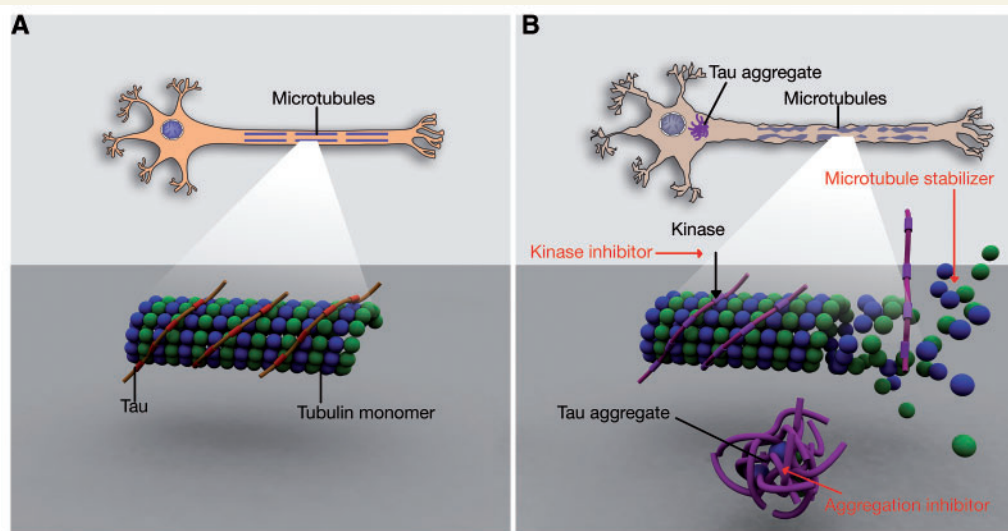

**Figure 4** Pathophysiological concept of tau-pathology in PSP. (A) Under physiological conditions, unphosphorylated tau (red) binds and thereby stabilizes microtubules, composed of tubulin monomers (blue and green), which are the railways for intraneuronal vesicle- and organelle-trafficking. (B) Under pathological conditions, presently available data from human post-mortem brains and experimental systems suggest a pathophysiological concept, according to which tau is hyperphosphorylated (lilac) by kinases, leading to detachment of tau from microtubules. Unbound phosphorylated tau, particularly as the 4R isoform, has an intrinsic propensity to form cytotoxic aggregates (toxic gain of function). Microtubules, in turn, are destabilized after detachment of tau and become depolymerized to tubulin-monomers, thereby losing their vital functions (loss of physiological function). Kinase inhibitors or tau-phosphatases, aggregation-inhibitors or tau-degradation enhancers and microtubule stabilizers may interfere with these pathological events at different levels.



several neurodegenerative diseases. It phosphorylates 95% of all phosphorylation sites on the tau protein and co-purifies with microtubules in biochemical assays (Jope and Johnson, 2004). It exists in two similar isoforms ( $\alpha$  and  $\beta$ ) encoded by two different genes. GSK-3 co-localizes with neurofibrillary tangle-like brain lesions in transgenic mice (Ishizawa *et al.*, 2003) as well as with hyperphosphorylated tau deposits in patients with PSP (Ferrer *et al.*, 2002). Lithium (Engel *et al.*, 2006) and other GSK-3 $\beta$  inhibitors block tau pathology in transgenic mice *in vivo* (Serenó *et al.*, 2009). These data suggest that the inhibition of GSK-3 $\beta$  might be a potential therapeutic target in PSP. Presently, several clinical trials with GSK-3 $\beta$  inhibitors have been initiated or are ongoing in patients with PSP [lithium, valproic acid, NP031112 (generic name, nypta)]. The clinical study with lithium has been stopped because of poor drug tolerability. Substances activating tau-phosphatases (Le Corre *et al.*, 2006) may also be of therapeutic interest.

There is also experimental evidence *in vivo* and *in vitro* suggesting a therapeutic benefit from small molecules acting as tau-aggregation inhibitors (Fig. 4C; for review see Bulic *et al.*, 2009). Recently, methylthioninium chloride was orally administered for 84 weeks in a double-blind, randomized phase II trial to 321 participants with Alzheimer's disease, which has tau-pathology similar to PSP. The interim report suggested an 81% reduction ( $P < 0.0001$ ) of the cognitive decline rate after 50 weeks of treatment in patients with mild to moderate cognitive impairment (Wischik *et al.*, 2008). The clinical results were supported by brain imaging data. A confirmation of these data would represent a breakthrough for the management of tauopathies and a proof of concept for the tau aggregation inhibition strategy.

In an attempt to prevent the loss of microtubular function, molecules binding and stabilizing microtubules are being evaluated (Fig. 4D). For example, in a transgenic mouse model of a tauopathy, the microtubule-stabilizing drug paclitaxel (TAXOL), an alkaloid of *Taxus brevifolia* (Samsonov *et al.*, 2004), has been shown to reverse fast axonal transport deficits by functionally substituting tau (Zhang *et al.*, 2005b). However, this approach did not successfully prevent neuronal cell death in a toxin-induced model of a tauopathy (Escobar-Khondiker *et al.*, 2007). NAP (NAPVSIPQ, generic name, davunetide) is a neuroprotective peptide (Gozes, 2007) interacting with the microtubule cytoskeleton to protect microtubule function (Divinski *et al.*, 2004; 2006; Gozes and Divinski, 2004; Matsuoka *et al.*, 2007). In a double-blind, randomized, placebo-controlled, multiple-dose phase II trial to evaluate the safety, tolerability and effect on cognitive function in patients with mild cognitive impairment, 12 weeks of intranasal administration of davunetide resulted in a statistically significant improvement in a psychometric test termed delayed-match-to-sample task by Week 16 (62.4% change from baseline,  $P = 0.038$  versus placebo) (<http://www.allontherapeutics.com>). A clinical trial to test the effects of danuvetide in PSP is presently being initiated.

Another promising therapeutic approach is the induction of increased degradation of molecules resulting in pathological conformation of tau and the resulting neuronal death. Novel chemical compounds aimed to reduce noxious tau species (<http://www.remynd.com>) have demonstrated robust efficacy in

transgenic tau mouse models of Alzheimer's disease (Dr Griffioen, personal communication). A drug candidate is being geared up for phase I clinical testing in 2011.

## Targeting mitochondrial dysfunction

Coenzyme Q10 is a lipophilic substance occurring in every cell of the human body. It serves to transport electrons from the complexes I and II to complex III (Fig. 3A). Its reversible oxidation is the basis for its function as electron carrier. Reduced coenzyme Q10 additionally functions as an intracellular antioxidant (Lagendijk *et al.*, 1996). In cultured neurons, coenzyme Q10 attenuates the toxicity of rotenone by preserving the mitochondrial membrane potential (Menke *et al.*, 2003; Moon *et al.*, 2005). *In vivo*, oral administration of coenzyme Q10 restored striatal complex I activity and ATP levels in a dose-dependent manner. Furthermore, it reduced neuronal apoptosis in rotenone-treated rats (Abdin *et al.*, 2008) and protected from neurodegeneration induced by MPTP (Cleren *et al.*, 2008). In patients with PSP, a regimen of 5 mg coenzyme Q10/kg/day for 6 weeks was studied in a double-blind, randomized, placebo-controlled, phase II trial, including 21 patients with clinically probable PSP. Compared to placebo, this treatment significantly increased the ratio of high-energy metabolites to low-energy metabolites (ATP/ADP, phosphorylated creatine/unphosphorylated creatine), as measured in the living brain by  $^{31}\text{P}$ - and  $^1\text{H}$ -MRS (Stamelou *et al.*, 2008). Concomitantly, the PSP rating scale and the frontal assessment battery, which are the most specific disease-related clinical scales, improved significantly upon coenzyme Q10 treatment compared to placebo. In this short-term coenzyme Q10 treatment, a restoration of higher energy levels may lead to a restoration of lost functions in individual neurons, thereby leading to mild clinical improvement. During long-term treatment, restoration of higher energy levels may prevent neurons from dying, thereby retarding disease progression. Thus, the main outcome of this study may lie in the fact that it provides a strong rationale for a phase III trial to study the disease-modifying, neuroprotective potential of coenzyme Q10 in PSP. A phase III trial of coenzyme Q10 for 12 months in patients with PSP is currently recruiting (NCT00382824).

Pyruvate is a free radical scavenger, niacinamide boosts the mitochondrial cofactor  $\text{NAD}^+$  and creatine is a rapidly accessible cellular energy buffer. These nutrients have been suggested to be neuroprotective in various animal models of brain injury or degeneration (Matthews *et al.*, 1998, 1999; Sullivan *et al.*, 2000; Fernandez-Gomez *et al.*, 2006; Wang *et al.*, 2007). On the basis of the mitochondrial hypothesis of PSP, a randomized, double-blind, placebo-controlled phase I pilot study to examine safety and tolerability of a cocktail of these nutrients over 6 months in patients with PSP is currently ongoing (NCT00605930).

## Conclusions

In recent years, much research has been done to elucidate the aetiology of this devastating disorder. Several lines of evidence point to a strong contribution of genetic predisposition and mitochondrial failure, possibly caused by environmental factors. Studies

are well underway to further define the precise identity of the genetic and environmental factors and their interplay to trigger the PSP-specific sequence of pathological events. Present knowledge has already facilitated the implementation of a series of rational clinical studies (Table 1). These studies are likely to reveal whether interference with the identified mechanisms will result in the development of urgently needed disease-modifying therapies.

## Funding

CurePSP<sup>+</sup> Charles D. Peebler Jr. PSP and CBD Genetics Program to G.U.H., R.d.S. and U.M., the Medical Research Council UK to R.d.S. (G0501560), German National Genome Research Network (01GS08136-4 to G.U.H.), and the Deutsche Forschungsgemeinschaft to G.U.H. (HO2402/6-1).

## References

- Abdin AA, Hamouda HE. Mechanism of the neuroprotective role of coenzyme Q10 with or without L-dopa in rotenone-induced parkinsonism. *Neuropharmacology* 2008; 55: 1340–6.
- Ahmed Z, Josephs KA, Gonzalez J, DelleDonne A, Dickson DW. Clinical and neuropathologic features of progressive supranuclear palsy with severe pallido-nigro-luysial degeneration and axonal dystrophy. *Brain* 2008; 131: 460–72.
- Albers DS, Augood SJ, Martin DM, Standaert DG, Vonsattel JP, Beal MF. Evidence for oxidative stress in the subthalamic nucleus in PSP. *J Neurochem* 1999; 73: 881–4.
- Albers DS, Augood SJ, Park LC, Browne SE, Martin DM, Adamson J, et al. Frontal lobe dysfunction in PSP: Evidence for oxidative stress and mitochondrial impairment. *J Neurochem* 2000; 74: 878–81.
- Albers DS, Swerdlow RH, Manfredi G, Gajewski C, Yang L, Parker WD Jr, et al. Further evidence for mitochondrial dysfunction in progressive supranuclear palsy. *Exp Neurol* 2001; 168: 196–8.
- Albers DS, Beal MF. Mitochondrial dysfunction in progressive supranuclear palsy. *Neurochem Int* 2002; 40: 559–64.
- Andreadis A, Wagner BK, Broderick JA, Kosik KS. A tau promoter region without neuronal specificity. *J Neurochem* 1996; 66: 2257–63.
- Angibaud G, Gaultier C, Rascol O. Atypical parkinsonism and Annonaceae consumption in New Caledonia. *Mov Disord* 2004; 19: 603–4.
- Atzori C, Ghetti B, Piva R, Srinivasan AN, Zolo P, Delisle MB, et al. Activation of the JNK/p38 pathway occurs in diseases characterized by tau protein pathology and is related to tau phosphorylation but not to apoptosis. *J Neuropathol Exp Neurol* 2001; 60: 1190–7.
- Baker M, Litvan I, Houlden H, Adamson J, Dickson D, Perez-Tur J, et al. Association of an extended haplotype in the tau gene with progressive supranuclear palsy. *Hum Mol Genet* 1999; 8: 711–5.
- Bender A, Krishnan KJ, Morris CM, Taylor GA, Reeve AK, Perry RH, et al. High levels of mitochondrial DNA deletions in substantia nigra neurons in aging and Parkinson disease. *Nat Genet* 2006; 38: 515–7.
- Betarbet R, Sherer TB, MacKenzie G, Garcia-Osuna M, Panov AV, Greenamyre JT. Chronic systemic pesticide exposure reproduces features of Parkinson's disease. *Nat Neurosci* 2000; 3: 1301–6.
- Blin J, Baron JC, Dubois B, Pillon B, Cambon H, Cambier J, et al. Positron emission tomography study in progressive supranuclear palsy. *Arch Neurol* 1990; 47: 747–52.
- Bower JH, Maraganore DM, McDonnell SK, Rocca WA. Incidence of progressive supranuclear palsy and multiple system atrophy in Olmsted County, Minnesota, 1976 to 1990. *Neurology* 1997; 49: 1284–8.
- Bulic B, Pickhardt M, Schmidt B, Mandelkow EM, Waldmann H, Mandelkow E. Development of tau aggregation inhibitors for Alzheimer's disease. *Angew Chem Int Ed Engl* 2009; 48: 1740–52.
- Burn DJ, Lees AJ. Progressive supranuclear palsy: where are we now? *Lancet Neurol* 2002; 1: 359–69.
- Burn DJ, Sawle GV, Brooks DJ. Differential diagnosis of Parkinson's disease, multiple system atrophy, and Steele-Richardson-Olszewski syndrome: discriminant analysis of striatal 18F-dopa PET data. *J Neurol Neurosurg Psychiatry* 1994; 57: 278–84.
- Caffrey TM, Joachim C, Paracchini S, Esiri MM, Wade-Martins R. Haplotype-specific expression of exon 10 at the human *MAPT* locus. *Hum Mol Genet* 2006; 15: 3529–37.
- Caffrey TM, Joachim C, Wade-Martins R. Haplotype-specific expression of the N-terminal exons 2 and 3 at the human *MAPT* locus. *Neurobiol Aging* 2008; 29: 1923–9.
- Cantuti-Castelvetri I, Keller-McGandy CE, Albers DS, Beal MF, Vonsattel JP, Standaert DG, et al. Expression and activity of antioxidants in the brain in progressive supranuclear palsy. *Brain Res* 2002; 930: 170–81.
- Caparros-Lefebvre D, Elbaz A. Possible relation of atypical parkinsonism in the French West Indies with consumption of tropical plants: a case-control study. *Caribbean Parkinsonism Study Group. Lancet* 1999; 354: 281–6.
- Caparros-Lefebvre D, Sargent N, Lees AJ, Camuzat A, Daniel S, Lannuzel A, et al. Guadeloupean parkinsonism: a cluster of progressive supranuclear palsy-like tauopathy. *Brain* 2002; 125: 801–11.
- Caparros-Lefebvre D, Lees AJ. Atypical unclassifiable parkinsonism on Guadeloupe: an environmental toxic hypothesis. *Mov Disord* 2005; 20: 114–8.
- Caparros-Lefebvre D, Steele J, Kotake Y, Otha S. Geographic isolates of atypical Parkinsonism and tauopathy in the tropics: possible synergy of neurotoxins. *Mov Disord* 2006; 21: 1769–71.
- Champy P, Höglinger GU, Feger J, Gleze C, Hocquemiller R, Laurens A, et al. Annonacin, a lipophilic inhibitor of mitochondrial complex I, induces nigral and striatal neurodegeneration in rats: possible relevance for atypical parkinsonism in Guadeloupe. *J Neurochem* 2004; 88: 63–9.
- Chang L, Karin M. Mammalian MAP kinase signalling cascades. *Nature* 2001; 410: 37–40.
- Chirichigno JW, Manfredi G, Beal MF, Albers DS. Stress-induced mitochondrial depolarization and oxidative damage in PSP cybrids. *Brain Res* 2002; 951: 31–5.
- Cleren C, Yang L, Lorenzo B, Calingasan NY, Schomer A, Sireci A, et al. Therapeutic effects of coenzyme Q10 (CoQ10) and reduced CoQ10 in the MPTP model of Parkinsonism. *J Neurochem* 2008; 104: 1613–21.
- Conrad C, Andreadis A, Trojanowski JQ, Dickson DW, Kang D, Chen X, et al. Genetic evidence for the involvement of tau in progressive supranuclear palsy. *Ann Neurol* 1997; 41: 277–81.
- Cruchaga C, Vidal-Taboada JM, Ezquerro M, Lorenzo E, Martinez-Lage P, Blazquez M, et al. Upstream variants of *CRHR1* and *MAPT* genes associated with age at onset in progressive supranuclear palsy and cortical basal degeneration. *Neurobiol Dis* 2009; 33: 164–70.
- Daniel SE, De Bruin VM, Lees AJ. The clinical and pathological spectrum of Steele-Richardson-Olszewski syndrome (progressive supranuclear palsy): a reappraisal. *Brain* 1995; 118: 759–70.
- de Silva R, Weiler M, Morris HR, Martin ER, Wood NW, Lees AJ. Strong association of a novel Tau promoter haplotype in progressive supranuclear palsy. *Neurosci Lett* 2001; 311: 145–8.
- de Yébenes JG, Sarasa JL, Daniel SE, Lees AJ. Familial progressive supranuclear palsy. Description of a pedigree and review of the literature. *Brain* 1995; 118: 1095–103.
- Dexter DT, Jenner P, Schapira AH, Marsden CD. Alterations in levels of iron, ferritin, and other trace metals in neurodegenerative diseases affecting the basal ganglia. The Royal Kings and Queens Parkinson's Disease Research Group. *Ann Neurol* 1992; 32: 94–100.
- Dickey CA, Ash P, Klosak N, Lee WC, Petrucelli L, Hutton M, et al. Pharmacologic reductions of total tau levels; implications for the role of microtubule dynamics in regulating tau expression. *Mol Neurodegeneration* 2006; 1: 6.
- Dickson DW. Neuropathologic differentiation of progressive supranuclear palsy and corticobasal degeneration. *J Neurol* 1999; 246: 6–15.

- Divinski I, Mittelman L, Gozes I. A femtomolar acting octapeptide interacts with tubulin and protects astrocytes against zinc intoxication. *J Biol Chem* 2004; 279: 28531–8.
- Divinski I, Holtser-Cochav M, Vulih-Schultzman I, Steingart RA, Gozes I. Peptide neuroprotection through specific interaction with brain tubulin. *J Neurochem* 2006; 98: 973–84.
- Donahue CP, Muratore C, Wu JY, Kosik KS, Wolfe MS. Stabilization of the tau exon 10 stem loop alters pre-mRNA splicing. *J Biol Chem* 2006; 281: 23302–6.
- Donahue CP, Ni J, Rozners E, Glicksman MA, Wolfe MS. Identification of tau stem loop RNA stabilizers. *J Biomol Screen* 2007; 12: 789–99.
- Dou F, Netzer WJ, Tanemura K, Li F, Hartl FU, Takashima A, et al. Chaperones increase association of tau protein with microtubules. *Proc Natl Acad Sci USA* 2003; 100: 721–6.
- Eckert T, Barnes A, Dhawan V, Frucht S, Gordon MF, Feigin AS, et al. FDG PET in the differential diagnosis of parkinsonian disorders. *Neuroimage* 2005; 26: 912–21.
- Eckert T, Tang C, Ma Y, Brown N, Lin T, Frucht S, et al. Abnormal metabolic networks in atypical parkinsonism. *Mov Disord* 2008; 23: 727–33.
- Edwards TL, Scott WK, Almonte C, Burt A, Powell EH, Beecham GW, et al. Genome-wide association study confirms SNPs in SNCA and the MAPT region as common risk factors for Parkinson disease. *Ann Hum Genet* 2010; 74: 97–109.
- Engel T, Goni-Oliver P, Lucas JJ, Avila J, Hernandez F. Chronic lithium administration to FTDP-17 tau and GSK-3 $\beta$  overexpressing mice prevents tau hyperphosphorylation and neurofibrillary tangle formation, but preformed neurofibrillary tangles do not revert. *J Neurochem* 2006; 99: 1445–55.
- Escobar-Khondiker M, Höllerhage M, Muriel MP, Champy P, Bach A, Depienne C, et al. Annonacin, a natural mitochondrial complex I inhibitor, causes tau pathology in cultured neurons. *J Neurosci* 2007; 27: 7827–37.
- Evans W, Fung HC, Steele J, Eerola J, Tienari P, Pittman A, et al. The tau H2 haplotype is almost exclusively Caucasian in origin. *Neurosci Lett* 2004; 369: 183–5.
- Ezquerria M, Pastor P, Valdeoriola F, Molinuevo JL, Blesa R, Tolosa E, et al. Identification of a novel polymorphism in the promoter region of the tau gene highly associated to progressive supranuclear palsy in humans. *Neurosci Lett* 1999; 275: 183–6.
- Fergusson J, Landon M, Lowe J, Ward L, van Leeuwen FW, Mayer RJ. Neurofibrillary tangles in progressive supranuclear palsy brains exhibit immunoreactivity to frameshift mutant ubiquitin-B protein. *Neurosci Lett* 2000; 279: 69–72.
- Fernandez-Gomez FJ, Pastor MD, Garcia-Martinez EM, Melero-Fernandez de Mera R, Gou-Fabregas M, Gomez-Lazaro M, et al. Pyruvate protects cerebellar granular cells from 6-hydroxydopamine-induced cytotoxicity by activating the Akt signaling pathway and increasing glutathione peroxidase expression. *Neurobiol Dis* 2006; 24: 296–307.
- Ferrer I, Blanco R, Carmona M, Puig B. Phosphorylated mitogen-activated protein kinase (MAPK/ERK-P), protein kinase of 38 kDa (p38-P), stress-activated protein kinase (SAPK/JNK-P), and calcium/calmodulin-dependent kinase II (CaM kinase II) are differentially expressed in tau deposits in neurons and glial cells in tauopathies. *J Neural Transm* 2001a; 108: 1397–1415.
- Ferrer I, Blanco R, Carmona M, Ribera R, Goutan E, Puig B, et al. Phosphorylated map kinase (ERK1, ERK2) expression is associated with early tau deposition in neurones and glial cells, but not with increased nuclear DNA vulnerability and cell death, in Alzheimer disease, Pick's disease, progressive supranuclear palsy and corticobasal degeneration. *Brain Pathol* 2001b; 11: 144–58.
- Ferrer I, Barrachina M, Puig B. Glycogen synthase kinase-3 is associated with neuronal and glial hyperphosphorylated tau deposits in Alzheimer's disease, Pick's disease, progressive supranuclear palsy and corticobasal degeneration. *Acta Neuropathol* 2002; 104: 583–91.
- Fidani L, Kalinderi K, Bostantjopoulou S, Clarimon J, Goulas A, Katsarou Z, et al. Association of the Tau haplotype with Parkinson's disease in the Greek population. *Mov Disord* 2006; 21: 1036–39.
- Golbe LI, Ohman-Strickland PA. A clinical rating scale for progressive supranuclear palsy. *Brain* 2007; 130: 1552–65.
- Gozes I, Divinski I. NAP, a neuroprotective drug candidate in clinical trials, stimulates microtubule assembly in the living cell. *Curr Alzheimer Res* 2007; 4: 507–9.
- Gozes I, Divinski I. The femtomolar-acting NAP interacts with microtubules: novel aspects of astrocyte protection. *J Alzheimer's Dis* 2004; 6: 37–41.
- Hardy J, Pittman A, Myers A, Gwinn-Hardy K, Fung HC, de Silva R, et al. Evidence suggesting that Homo neanderthalensis contributed the H2 MAPT haplotype to Homo sapiens. *Biochem Soc Trans* 2005; 33: 582–5.
- Hartzler AW, Zhu X, Siedlak SL, Castellani RJ, Avila J, Perry G, et al. The p38 pathway is activated in Pick disease and progressive supranuclear palsy: a mechanistic link between mitogenic pathways, oxidative stress, and tau. *Neurobiol Aging* 2002; 23: 855–9.
- Hauw JJ, Daniel SE, Dickson D, Horoupian DS, Jellinger K, Lantos PL, et al. Preliminary NINDS neuropathologic criteria for Steele-Richardson-Olszewski syndrome (progressive supranuclear palsy). *Neurology* 1994; 44: 2015–9.
- Higgins JJ, Golbe LI, De Biase A, Jankovic J, Factor SA, Adler RL. An extended 5'-tau susceptibility haplotype in progressive supranuclear palsy. *Neurology* 2000; 55: 1364–7.
- Höglinger GU, Féger J, Prigent A, Michel PP, Parain K, Champy P, et al. Chronic systemic complex I inhibition induces a hypokinetic multisystem degeneration in rats. *J Neurochem* 2003; 84: 491–502.
- Höglinger GU, Lannuzel A, Escobar Khondiker M, Michel PP, Duyckaerts C, Féger J, et al. The mitochondrial complex I inhibitor rotenone triggers a cerebral tauopathy. *J Neurochem* 2005; 95: 930–9.
- Höllerhage M, Matusch A, Champy P, Lombès A, Ruberg M, Oertel WH, et al. Natural lipophilic inhibitors of mitochondrial complex I are candidate toxins for sporadic neurodegenerative tau pathologies. *Exp Neurol* 2009; 220: 133–42.
- Hope AD, de Silva R, Fischer DF, Hol EM, van Leeuwen FW, Lees AJ. Alzheimer's associated variant ubiquitin causes inhibition of the 26S proteasome and chaperone expression. *J Neurochem* 2003; 86: 394–404.
- Hope AD, Lashley T, Lees AJ, de Silva R. Failure in heat-shock protein expression in response to UBB+1 protein in progressive supranuclear palsy in humans. *Neurosci Lett* 2004; 359: 94–8.
- Hosaka K, Ishii K, Sakamoto S, Mori T, Sasaki M, Hirono N, et al. Voxel-based comparison of regional cerebral glucose metabolism between PSP and corticobasal degeneration. *J Neurol Sci* 2002; 199: 67–71.
- Houlden H, Baker M, Morris HR, MacDonald N, Pickering-Brown S, Adamson J, et al. Corticobasal degeneration and progressive supranuclear palsy share a common tau haplotype. *Neurology* 2001; 56: 1702–6.
- Iqbal K, Alonso Adel C, Grundke-Iqbal I. Cytosolic abnormally hyperphosphorylated tau but not paired helical filaments sequester normal MAPs and inhibit microtubule assembly. *J Alzheimer Dis* 2008; 14: 365–70.
- Ishizawa T, Sahara N, Ishiguro K, Kersh J, McGowan E, Lewis J, et al. Co-localization of glycogen synthase kinase-3 with neurofibrillary tangles and granulovacuolar degeneration in transgenic mice. *Am J Pathol* 2003; 163: 1057–67.
- Iwasaki Y, Yoshida M, Hashizume Y, Hattori M, Aiba I, Sobue G. Widespread spinal cord involvement in progressive supranuclear palsy. *Neuropathology* 2007; 27: 331–40.
- Javitch JA, D'Amato RJ, Strittmatter SM, Snyder SH. Parkinsonism-inducing neurotoxin, N-methyl-4-phenyl-1,2,3,6-tetrahydropyridine: uptake of the metabolite N-methyl-4-phenylpyridine by dopamine neurons explains selective toxicity. *Proc Natl Acad Sci USA* 1985; 82: 2173–7.
- Jenner P, Olanow CW. Oxidative stress and the pathogenesis of Parkinson's disease. *Neurology* 1996; 47: 161–70.
- Johnson KA, Sperling RA, Holman BL, Nagel JS, Growdon JH. Cerebral perfusion in progressive supranuclear palsy. *J Nucl Med* 1992; 33: 704–9.



- Jope RS, Johnson GV. The glamour and gloom of glycogen synthase kinase-3. *Trends Biochem Sci* 2004; 29: 95–102.
- Josephs KA, Boeve BF, Duffy JR, Smith GE, Knopman DS, Parisi JE, et al. Atypical progressive supranuclear palsy underlying progressive apraxia of speech and nonfluent aphasia. *Neurocase* 2005; 11: 283–96.
- Josephs KA, Petersen RC, Knopman DS, Boeve BF, Whitwell JL, Duffy JR, et al. Clinicopathologic analysis of frontotemporal and corticobasal degenerations and PSP. *Neurology* 2006; 66: 41–8.
- Juh R, Kim J, Moon D, Choe B, Suh T. Different metabolic patterns analysis of Parkinsonism on the 18F-FDG PET. *Eur J Radiol* 2004; 51: 223–33.
- Juh R, Pae CU, Kim TS, Lee CU, Choe B, Suh T. Cerebral glucose metabolism in corticobasal degeneration comparison with progressive supranuclear palsy using statistical mapping analysis. *Neurosci Lett* 2005; 383: 22–7.
- Kaat LD, Boon AJ, Kamphorst W, Ravid R, Duivenvoorden HJ, van Swieten JC. Frontal presentation in progressive supranuclear palsy. *Neurology* 2007; 69: 723–29.
- Kaat LD, Boon AJ, Azmani A, Kamphorst W, Breteler MM, Anar B, et al. Familial aggregation of parkinsonism in progressive supranuclear palsy. *Neurology* 2009; 73: 98–105.
- Karbe H, Grond M, Huber M, Herholz K, Kessler J, Heiss WD. Subcortical damage and cortical dysfunction in progressive supranuclear palsy demonstrated by positron emission tomography. *J Neurol* 1992; 239: 98–102.
- Kornblihtt AR. Coupling transcription and alternative splicing. *Adv Exp Med Biol* 2007; 623: 175–89.
- Lagendijk J, Ubbink JB, Vermaak WJ. Measurement of the ratio between the reduced and oxidized forms of coenzyme Q10 in human plasma as a possible marker of oxidative stress. *J Lipid Res* 1996; 37: 67–75.
- Lannuzel A, Höglinger GU, Verhaeghe S, Gire L, Belson S, Escobar-Khondiker M, et al. Atypical parkinsonism in Guadeloupe: a common risk factor for two closely related phenotypes? *Brain* 2007; 130: 816–27.
- Le Corre S, Klafki HW, Plesnila N, Hübinger G, Obermeier A, Sahagún H, et al. An inhibitor of tau hyperphosphorylation prevents severe motor impairments in tau transgenic mice. *Proc Natl Acad Sci USA* 2006; 103: 9673–78.
- Lenaz G, Fato R, Genova ML, Bergamini C, Bianchi C, Biondi A. Mitochondrial complex I: structural and functional aspects. *Biochim Biophys Acta* 2006; 1757: 1406–20.
- Le-Niculescu H, Bonfoco E, Kasuya Y, Claret FX, Green DR, Karin M. Withdrawal of survival factors results in activation of the JNK pathway in neuronal cells leading to Fas ligand induction and cell death. *Mol Cell Biol* 1999; 19: 751–63.
- Litvan I, Agid Y, Calne D, Campbell G, Dubois B, Duvoisin RC, et al. Clinical research criteria for the diagnosis of progressive supranuclear palsy (Steele-Richardson-Olszewski syndrome): report of the NINDS-SPSP international workshop. *Neurology* 1996; 47: 1–9.
- Litvan I. Update on epidemiological aspects of progressive supranuclear palsy. *Mov Disord* 2003; 18: 43–50.
- Liu Y, Peacey E, Dickson J, Donahue CP, Zheng S, Varani G, et al. Mitoxantrone analogues as ligands for a stem-loop structure of tau pre-mRNA. *J Med Chem* 2009; 52: 6523–6.
- Loeffler DA, LeWitt PA, Juneau PL, Sima AA, Nguyen HU, DeMaggio AJ, et al. Increased regional brain concentrations of ceruloplasmin in neurodegenerative disorders. *Brain Res* 1996; 738: 265–74.
- Matthews RT, Yang L, Jenkins BG, Ferrante RJ, Rosen BR, Kaddurah-Daouk R, et al. Neuroprotective effects of creatine and cyclocreatine in animal models of Huntington's disease. *J Neurosci* 1998; 18: 156–63.
- Matthews RT, Ferrante RJ, Klivenyi P, Yang L, Klein AM, Mueller G, et al. Creatine and cyclocreatine attenuate MPTP neurotoxicity. *Exp Neurol* 1999; 157: 142–9.
- Matsuoka Y, Gray AJ, Hirata-Fukae C, Minami SS, Waterhouse EG, Mattson MP, et al. Intranasal NAP administration reduces accumulation of amyloid peptide and tau hyperphosphorylation in a transgenic mouse model of Alzheimer's disease at early pathological stage. *J Mol Neurosci* 2007; 31: 165–70.
- Mecocci P, MacGarvey U, Kaufmann AE, Koontz D, Shoffner JM, Wallace DC. Oxidative damage in mitochondrial DNA shows marked age-dependent increases in human brain. *Ann Neurol* 1993; 34: 609–16.
- Melquist S, Craig DW, Huentelman MJ, Crook R, Pearson JV, Baker M, et al. Identification of a novel risk locus for progressive supranuclear palsy by a pooled genomewide scan of 500,288 single-nucleotide polymorphisms. *Am J Hum Genet* 2007; 80: 769–78.
- Menke T, Gille G, Reber F, Janetzky B, Andler W, Funk RH, et al. Coenzyme Q10 reduces the toxicity of rotenone in neuronal cultures by preserving the mitochondrial membrane potential. *Biofactors* 2003; 18: 65–72.
- Miller RM, Callahan LM, Casaceli C, Chen L, Kiser GL, Chui B, et al. Dysregulation of gene expression in the 1-methyl-4-phenyl-1,2,3,6-tetrahydropyridine-lesioned mouse substantia nigra. *J Neurosci* 2004; 24: 7445–54.
- Moffett JR, Ross B, Arun P, Madhavarao CN, Nambodiri MAA. N-Acetylaspartate in the CNS: from Neurodiagnostics to Neurobiology. *Prog Neurobiol* 2007; 81: 89–131.
- Moon Y, Lee KH, Park JH, Geum D, Kim K. Mitochondrial membrane depolarization and the selective death of dopaminergic neurons by rotenone: protective effect of coenzyme Q10. *J Neurochem* 2005; 93: 1199–208.
- Morris HR, Osaki Y, Holton J, Lees AJ, Wood NW, Revesz T, et al. Tau exon 10 +16 mutation FTDP-17 presenting clinically as sporadic young onset PSP. *Neurology* 2003; 61: 102–4.
- Myers AJ, Pittman AM, Zhao AS, Rohrer K, Kaleem M, Marlowe L, et al. The MAPT H1c risk haplotype is associated with increased expression of tau and especially of 4 repeat containing transcripts. *Neurobiol Dis* 2007; 25: 561–70.
- Nath U, Ben-Shlomo Y, Thomson RG, Morris HR, Wood NW, Lees AJ, et al. The prevalence of progressive supranuclear palsy (Steele-Richardson-Olszewski syndrome) in the UK. *Brain* 2001; 124: 1438–49.
- Odetti P, Garibaldi S, Norese R, Angelini G, Marinelli L, Valentini S, et al. Lipoperoxidation is selectively involved in progressive supranuclear palsy. *J Neuropathol Exp Neurol* 2000; 59: 393–7.
- Oliva R, Tolosa E, Ezquerra M, Molinuevo JL, Valdeorriola F, Burguera J, et al. Significant changes in the tau A0 and A3 alleles in progressive supranuclear palsy and improved genotyping by silver detection. *Arch Neurol* 1998; 55: 1122–4.
- Pastor P, Pastor E, Carnero C, Vela R, García T, Amer G, et al. Familial atypical progressive supranuclear palsy associated with homozygosity for the delN296 mutation in the tau gene. *Ann Neurol* 2001; 49: 263–7.
- Pittman AM, Fung HC, de Silva R. Untangling the tau gene association with neurodegenerative disorders. *Hum Mol Genet* 2006; 15: 188–95.
- Pittman AM, Myers AJ, Abou-Sleiman P, Fung HC, Kaleem M, Marlowe L, et al. Linkage disequilibrium fine mapping and haplotype association analysis of the tau gene in progressive supranuclear palsy and corticobasal degeneration. *J Med Genet* 2005; 42: 837–46.
- Poorkaj P, Muma NA, Zhukareva V, Cochran EJ, Shannon KM, Hurtig H, et al. An R5L tau mutation in a subject with a progressive supranuclear palsy phenotype. *Ann Neurol* 2002; 52: 511–6.
- Querfurth HW, LaFerla FM. Alzheimer's disease. *N Engl J Med* 2010; 362: 329–44.
- Quintanilla RA, Johnson GVW. Role of mitochondrial dysfunction in the pathogenesis of Huntington's disease. *Brain Res Bull* 2009; 80: 242–7.
- Rademakers R, Melquist S, Cruts M, Theuns J, Del-Favero J, Poorkaj P, et al. High-density SNP haplotyping suggests altered regulation of tau gene expression in progressive supranuclear palsy. *Hum Mol Genet* 2005; 14: 3281–92.
- Rajput A, Rajput AH. Progressive supranuclear palsy: clinical features, pathophysiology and management. *Drugs Aging* 2001; 18: 913–25.



- Rango M, Arighi A, Biondetti P, Barberis B, Bonifati C, Blandini F, et al. Magnetic resonance spectroscopy in Parkinson's disease and parkinsonian syndromes. *Functional Neurology* 2007; 22: 75–9.
- Reynolds CH, Utton MA, Gibb GM, Yates A, Anderton BH. Stress-activated protein kinase/c-jun N-terminal kinase phosphorylates tau protein. *J Neurochem* 1997; 68: 1736–44.
- Reynolds CH, Betts JC, Blackstock WP, Nebreda AR, Anderton BH. Phosphorylation sites on tau identified by nanoelectrospray mass spectrometry: differences in vitro between the mitogen-activated protein kinases ERK2, c-Jun N-terminal kinase and P38, and glycogen synthase kinase-3 $\beta$ . *J Neurochem* 2000; 74: 1587–95.
- Ros R, Thobois S, Streichenberger N, Kopp N, Sánchez MP, Pérez M, et al. A new mutation of the tau gene, G303V, in early-onset familial progressive supranuclear palsy. *Arch Neurol* 2005a; 62: 1444–50.
- Ros R, Gómez Garre P, Hirano M, Tai YF, Ampuero I, Vidal L, et al. Genetic linkage of autosomal dominant progressive supranuclear palsy to 1q31.1. *Ann Neurol* 2005b; 57: 634–41.
- Rossi G, Gasparoli E, Pasquali C, Di Fede G, Testa D, Albanese A, et al. Progressive supranuclear palsy and Parkinson's disease in a family with a new mutation in the tau gene. *Ann Neurol* 2004; 55: 448.
- Samsonov A, Yu JZ, Rasenick M, Popov SV. Tau interaction with microtubules in vivo. *J Cell Sci* 2004; 117: 6129–41.
- Santens P, De Reuck J, Crevits L, Decoo D, Lemahieu I, Strijckmans K, et al. Cerebral oxygen metabolism in patients with progressive supranuclear palsy: a positron emission tomography study. *Eur Neurol* 1997; 37: 18–22.
- Sas K, Robotka H, Toldi J, Vécsei L. Mitochondria, metabolic disturbances, oxidative stress and the kynurenine system, with focus on neurodegenerative disorders. *J Neurol Sci* 2007; 257: 221–39.
- Schapiro AH. Mitochondrial dysfunction in neurodegenerative diseases. *Neurochem Res* 2008; 33: 2502–9.
- Schrag A, Ben-Shlomo Y, Quinn NP. Prevalence of progressive supranuclear palsy and multiple system atrophy: a cross-sectional study. *Lancet* 1999; 354: 1771–5.
- Serenó L, Coma M, Rodríguez M, Sánchez-Ferrer P, Sánchez MB, Gich I, et al. A novel GSK-3 $\beta$  inhibitor reduces Alzheimer's pathology and rescues neuronal loss in vivo. *Neurobiol Dis* 2009; 35: 359–67.
- Sian J, Dexter DT, Lees AJ, Daniel S, Agid Y, Javoy-Agid F, et al. Alterations in glutathione levels in Parkinson's disease and other neurodegenerative disorders affecting basal ganglia. *Ann Neurol* 1994; 36: 348–55.
- Skipper L, Wilkes K, Toft M, Baker M, Lincoln S, Hulihan M, et al. Linkage disequilibrium and association of MAPT H1 in Parkinson disease. *Am J Hum Genet* 2004; 75: 669–77.
- Smith MA, Kutty RK, Richey PL, Yan SD, Stern D, Chader GJ. Hemeoxygenase-1 is associated with neurofibrillary pathology of Alzheimer's disease. *Am J Pathol* 1994; 145: 42–7.
- Smith PD, Crocker SJ, Jackson-Lewis V, Jordan-Sciutto KL, Hayley S, Mount MP, et al. Cyclin-dependent kinase 5 is a mediator of dopaminergic neuron loss in a mouse model of Parkinson's disease. *Proc Natl Acad Sci USA* 2003; 100: 13650–5.
- Stamelou M, Pilatus U, Reuss A, Magerkurth J, Eggert KM, Knake S, et al. In vivo evidence for cerebral depletion in high-energy phosphates in progressive supranuclear palsy. *J Cereb Blood Flow Metab* 2009; 29: 861–70.
- Stamelou M, Reuss A, Pilatus U, Magerkurth J, Niklowitz P, Eggert KM, et al. Short-term effects of coenzyme Q10 in progressive supranuclear palsy: a randomized, placebo-controlled trial. *Mov Disord* 2008; 23: 942–9.
- Stanford PM, Halliday GM, Brooks WS, Kwok JBJ, Storey CE, Creasey H, et al. Progressive supranuclear palsy pathology caused by a novel silent mutation in exon 10 of the tau gene. Expansion of the disease phenotype caused by tau gene mutations. *Brain* 2000; 123: 880–93.
- Stefansson H, Helgason A, Thorleifsson G, Steinthorsdottir V, Masson G, Barnard J, et al. A common inversion under selection in Europeans. *Nat Genet* 2005; 37: 129–37.
- Sullivan PG, Geiger JD, Mattson MP, Scheff SW. Dietary supplement creatine protects against traumatic brain injury. *Ann Neurol* 2000; 48: 723–9.
- Swerdlow RH, Golbe LI, Parks JK, Cassarino DS, Binder DR, Grawey AE, et al. Mitochondrial dysfunction in cybrid lines expressing mitochondrial genes from patients with progressive supranuclear palsy. *J Neurochem* 2000; 75: 1681–4.
- Thomas JR, Liu X, Hergenrother PJ. Biochemical and thermodynamic characterization of compounds that bind to RNA hairpin loops: toward an understanding of selectivity. *Biochemistry* 2006; 45: 10928–38.
- Tor Y. Targeting RNA with small molecules. *Chembiochem* 2003; 4: 998–1007.
- Tsuboi Y, Josephs KA, Boeve BF, Litvan I, Caselli RJ, Caviness JN, et al. Increased tau burden in the cortices of progressive supranuclear palsy presenting with corticobasal syndrome. *Mov Disord* 2005; 20: 982–8.
- van Leeuwen FW, de Kleijn DP, van den Hurk HH, Neubauer A, Sonnemans MA, Sluijs JA, et al. Frameshift mutants of beta amyloid precursor protein and ubiquitin-B in Alzheimer's and Down patients. *Science* 1998; 279: 242–7.
- Vandrovcova J, Pittman AM, Malzer E, Abou-Sleiman PM, Lees AJ, Wood NW, et al. Association of MAPT haplotype-tagging SNPs with sporadic Parkinson's disease. *Neurobiol Aging* 2009; 30: 1477–82.
- Varani L, Spillantini MG, Goedert M, Varani G. Structural basis for recognition of the RNA major groove in the tau exon 10 splicing regulatory element by aminoglycoside antibiotics. *Nucleic Acids Res* 2000; 28: 710–9.
- Wang X, Perez E, Liu R, Yan LJ, Mallet RT, Yang SH. Pyruvate protects mitochondria from oxidative stress in human neuroblastoma SK-N-SH cells. *Brain Res* 2007; 1132: 1–9.
- Williams DR, de Silva R, Paviour DC, Pittmann A, Watt HC, Kilford L, et al. Characteristics of two distinct clinical phenotypes in pathologically proven progressive supranuclear palsy: Richardson's syndrome and PSP-parkinsonism. *Brain* 2005; 128: 1247–58.
- Williams DR, Holton JL, Strand K, Revesz T, Lees AJ. Pure akinesia with gait freezing: A third clinical phenotype of progressive supranuclear palsy. *Mov Disord* 2007; 22: 2235–41.
- Williams DR, Lees AJ. Progressive supranuclear palsy: clinicopathological concepts and diagnostic challenges. *Lancet Neurol* 2009; 8: 270–9.
- Wischik CM, Benthams P, Wischik DJ, Seng KM. Tau Aggregation Inhibitors (TAI) Therapy with Rembertm Arrests Disease Progression in Mild and Moderate Alzheimer's Disease over 50 Weeks. Chicago: International Conference on Alzheimer's Disease; 2008. Abstract 03-04-07.
- Xia Z, Dickens M, Raingeaud J, Davis RJ, Greenberg ME. Opposing effects of ERK and JNK-p38 MAP kinases on apoptosis. *Science* 1995; 270: 1326–31.
- Yakes FM, Van Houten B. Mitochondrial DNA damage is more extensive and persists longer than nuclear DNA damage in human cells following oxidative stress. *Proc Natl Acad Sci USA* 1997; 94: 514–9.
- Zaman GJ, Michiels PJ, van Boeckel CA. Targeting RNA: new opportunities to address drugless targets. *Drug Discov Today* 2003; 8: 297–306.
- Zafra-Polo MC, González MC, Estornell E, Sahpaz S, Cortes D. Acetogenins from Annonaceae, inhibitors of mitochondrial complex I. *Phytochemistry* 1996; 42: 253–71.
- Zhang J, Song Y, Chen H, Fan D. The tau gene haplotype h1 confers a susceptibility to Parkinson's disease. *European Neurology* 2005a; 53: 15–21.
- Zhang B, Maiti A, Shively S, Lakhani F, McDonald-Jones G, Bruce J, et al. Microtubule-binding drugs offset tau sequestration by stabilizing microtubules and reversing fast axonal transport deficits in a tauopathy model. *Proc Natl Acad Sci USA* 2005b; 102: 227–31.
- Zheng S, Chen Y, Donahue CP, Wolfe MS, Varani G. Structural basis for stabilization of the tau pre-mRNA splicing regulatory element by novantrone (mitoxantrone). *Chem Biol* 2009; 16: 557–66.
